# Supplementary material for: Conformational studies on substituted ε-caprolactams by X-ray crystallography and NMR spectroscopy
Source: Royal Society of Chemistry journal article supplement (doi:10.1039/c4nj01339e), 2014-09-25
Supplement: c4nj01339e1.pdf [file c4nj01339e1.pdf]

**ELECTRONIC SUPPLEMENTARY MATERIAL (ESI) FOR NEW  
JOURNAL OF CHEMISTRY**

**Supporting Information**

**Conformational studies on substituted  
 $\epsilon$ -caprolactams by X-ray crystallography and NMR  
spectroscopy**

Tobias Gruber,<sup>a,\*</sup> Amber L. Thompson,<sup>a</sup> Barbara Odell,<sup>a</sup> Petra Bombicz,<sup>b</sup>  
Christopher J. Schofield<sup>a,\*</sup>

<sup>a</sup> University of Oxford, Department of Chemistry, Chemistry Research Laboratory, 12  
Mansfield Road, Oxford OX1 3TA, United Kingdom. E-mail:  
christopher.schofield@chem.ox.ac.uk; Fax: +44 1865 285002; Tel: +44 1865 275625 or  
tobias.gruber@chemie.tu-freiberg.de; Tel: +49 3731 392390

<sup>b</sup> Institute of Organic Chemistry, Research Centre for Natural Sciences, Hungarian Academy  
of Sciences, Magyar Tudósok körútja 2., H-1117 Budapest, Hungary

**Table S1**

Distances (Å) and angles (°) of hydrogen bond type interactions in the here discussed X-ray structures

| Atoms involved               | Distance (Å)            |        |          | Angle (°) |        |
|------------------------------|-------------------------|--------|----------|-----------|--------|
|                              | Symmetry                | d(D-H) | d(H...A) | d(D...A)  | <(DHA) |
| <b>1</b>                     |                         |        |          |           |        |
| N(1)-H(11)...O(1)            | $-x+2, -y, -z+2$        | 0.85   | 2.25     | 3.056(3)  | 160    |
| C(6)-H(61)...O(1)            | $x-1, y, z$             | 0.98   | 2.52     | 3.498(3)  | 174    |
| C(8)-H(81)...O(2)            | $x-1, y, z$             | 0.95   | 2.52     | 3.258(3)  | 134    |
| <b>2</b>                     |                         |        |          |           |        |
| $\hat{N}(1A)$ -H(1A)...O(2C) | $x, y, z$               | 0.85   | 2.14     | 2.970(4)  | 164    |
| O(3A)-H(3A)...O(1A)          | $x, y, z$               | 0.82   | 1.75     | 2.555(4)  | 169    |
| N(1B)-H(1B)...O(2A)          | $x, y, z$               | 0.85   | 2.18     | 2.996(4)  | 162    |
| O(3B)-H(3B)...O(1C)          | $x, y, z$               | 0.84   | 1.72     | 2.543(4)  | 170    |
| N(1C)-H(1C)...O(2B)          | $x, y, z$               | 0.85   | 2.25     | 3.074(4)  | 162    |
| O(3C)-H(3C)...O(1A)          | $x, y, z$               | 0.85   | 1.72     | 2.553(4)  | 170    |
| <b>3</b>                     |                         |        |          |           |        |
| C(6)-H(61)...O(2)            | $-x+1, -y, -z+1$        | 0.95   | 2.57     | 3.341(2)  | 139    |
| <b>5 cis</b>                 |                         |        |          |           |        |
| C(2)-H(21)...O(1)            | $-x+2, y+1/2, -z+3/2$   | 0.97   | 2.52     | 3.392(2)  | 150    |
| C(4)-H(42)...O(3)            | $-x+1, y-1/2, -z+3/2$   | 0.96   | 2.50     | 3.331(2)  | 144    |
| C(5)-H(52)...O(1)            | $x-1, y, z$             | 0.98   | 2.44     | 3.279(2)  | 143    |
| C(6)-H(61)...O(1)            | $-x+2, y+1/2, -z+3/2$   | 0.95   | 2.51     | 3.363(2)  | 150    |
| <b>5 trans</b>               |                         |        |          |           |        |
| N(1)-H(11)...O(1)            | $-x+1, -y+1, -z+2$      | 0.87   | 2.00     | 2.868(4)  | 176    |
| C(6)-H(61)...O(2)            | $x, y, z$               | 0.97   | 2.42     | 3.157(4)  | 132    |
| C(10)-H(101)...O(2)          | $-x+2, -y, -z+1$        | 0.95   | 2.40     | 3.235(4)  | 147    |
| <b>6 cis</b>                 |                         |        |          |           |        |
| C(2)-H(21)...O(1)            | $-x+3/2, y+1/2, -z+1/2$ | 0.94   | 2.56     | 3.4627(2) | 162    |
| C(4)-H(42)...O(3)            | $-x+1/2, y-1/2, -z+1/2$ | 0.94   | 2.51     | 3.3072(2) | 143    |
| C(5)-H(52)...O(1)            | $x-1, y, z$             | 0.95   | 2.55     | 3.4293(2) | 154    |
| <b>7</b>                     |                         |        |          |           |        |
| N(1)-H(11)...O(1)            | $-x+2, -y+2, -z+1$      | 0.88   | 1.98     | 2.862(2)  | 179    |
| C(2)-H(21)...O(1)            | $-x+2, -y+1, -z+1$      | 0.96   | 2.47     | 3.410(2)  | 168    |
| C(6)-H(61)...O(2)            | $-x+1, -y+2, -z+2$      | 0.97   | 2.50     | 3.277(2)  | 138    |

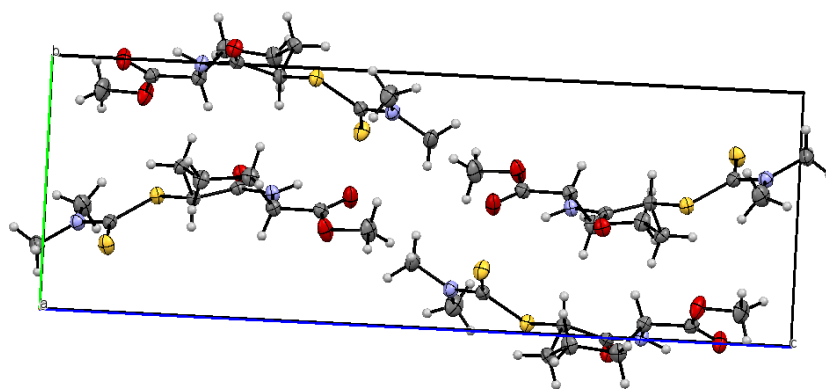

a)

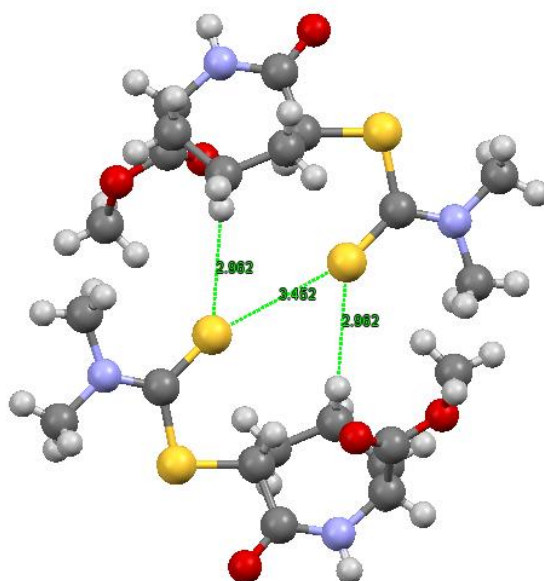

b)

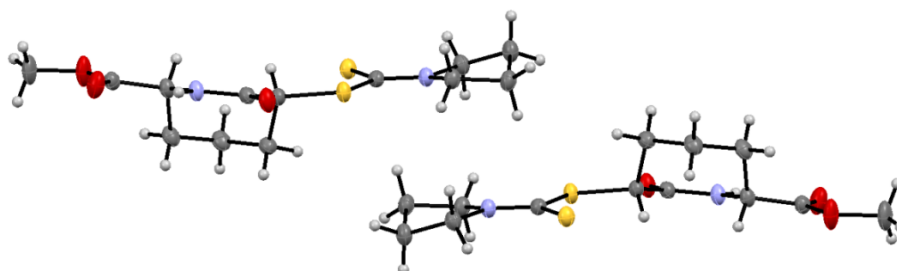

c)

**Fig. S1** Packing behaviour of dithiocarbamates *cis*-5 (a), *trans*-5 (b) and *cis*-6 (c).
